# Supplementary material for: Exploring the phase behavior of C8-BTBT-C8 at ambient and high temperatures: insights and challenges from molecular dynamics simulations
Source: Royal Society of Chemistry journal article supplement (doi:10.1039/d4cp01884b), 2024-01-01
Supplement: d4cp01884b1.pdf [file d4cp01884b1.pdf]

## Supporting Information

# Exploring the phase behavior of C8-BTBT-C8 at ambient and high temperatures: insights and challenges from molecular dynamics simulations

Mosè Casalegno,<sup>\*,†</sup> Simone Provenzano<sup>‡</sup>, Guido Raos,<sup>†</sup> Massimo Moret,<sup>\*,§</sup>

<sup>†</sup> Department of Chemistry, Materials and Chemical Engineering "G. Natta", Politecnico di Milano, via L. Mancinelli 7, 20131 Milano, Italy.

<sup>‡</sup> Applied Materials Inc., Reggio Emilia, Italy.

<sup>§</sup> Department of Materials Science, Università degli Studi di Milano-Bicocca, Via R. Cozzi 55, 20125 Milano, Italy.

Content:

|                                                                                                      |     |
|------------------------------------------------------------------------------------------------------|-----|
| ❖ <b>Figure S1.</b> Alkyl chains dynamics and conformations for angle $\tau_1$ .                     | S3  |
| ❖ <b>Figure S2.</b> Probability distributions of angles $\tau_2$ - $\tau_7$ .                        | S4  |
| ❖ <b>Table S1.</b> Percentages of torsional angle $\tau_2$ - $\tau_7$ conformations at 293 K.        | S4  |
| ❖ <b>Figure S3.</b> Alkyl chain steric hindrance, C8-BTBT-C8 vs. n-octane.                           | S5  |
| ❖ <b>Figure S4.</b> Distribution of torsion angles in subspace $\tau_3$ - $\tau_5$ - $\tau_7$ .      | S5  |
| ❖ <b>Figure S5.</b> Probability distribution of alkyl chains length $\ell$ .                         | S6  |
| ❖ <b>Table S2.</b> Relative abundances of $\tau_2\tau_3\tau_4\tau_5\tau_6\tau_7$ sequences at 293 K. | S7  |
| ❖ <b>Figure S6.</b> Distribution of chain tilt angle $\delta$ .                                      | S7  |
| ❖ <b>Table S3.</b> Average values of chain tilt angle $\delta$ .                                     | S7  |
| ❖ <b>Figure S7.</b> Distributions the core tilt angle $\varphi$ .                                    | S8  |
| ❖ <b>Figure S8.</b> C8-BTBT-C8 XRD vs. MD comparison: molecular structures.                          | S8  |
| ❖ <b>Figure S9.</b> C8-BTBT-C8 XRD vs. MD comparison: unit cells.                                    | S9  |
| ❖ <b>Figure S10.</b> C8-BTBT-C8 XRD vs. MD comparison: (001) monolayers.                             | S9  |
| ❖ <b>Figure S11.</b> Evolution of simulation box parameters at 380 K.                                | S10 |
| ❖ <b>Figure S12.</b> Cumulative dihedral angles distributions at 380 K.                              | S10 |
| ❖ <b>Table S4.</b> Relative abundances of $\tau_2\tau_3\tau_4\tau_5\tau_6\tau_7$ sequences at 380 K. | S11 |
| ❖ <b>Figure S13.</b> Evolution of simulation box parameters at 385 K.                                | S12 |
| ❖ <b>Figure S14.</b> Cumulative dihedral angles distributions at 385 K.                              | S12 |
| ❖ <b>Table S5.</b> Relative abundances of $\tau_2\tau_3\tau_4\tau_5\tau_6\tau_7$ sequences at 385 K. | S13 |
| ❖ <b>Figure S15.</b> HSPM images of mesophase during cooling.                                        | S14 |
| ❖ <b>Figure S16.</b> HSPM images of smectic phase during heating.                                    | S15 |
| ❖ <b>Figure S17.</b> HSPM images of liquid phase during cooling.                                     | S16 |
| ❖ <b>Figure S18.</b> Evolution of tilt angle $\varphi$ at 400 K.                                     | S17 |
| ❖ <b>Figure S19.</b> Evolution of the torsional angle $\tau_1$ at 400 K.                             | S17 |
| ❖ <b>Figure S20.</b> Snapshot of the isotropic phase after cooling from 460 to 385 K.                | S18 |
| ❖ <b>Movie S1.</b> Dynamics of C8-BTBT-C8 at 385 K.                                                  | S18 |

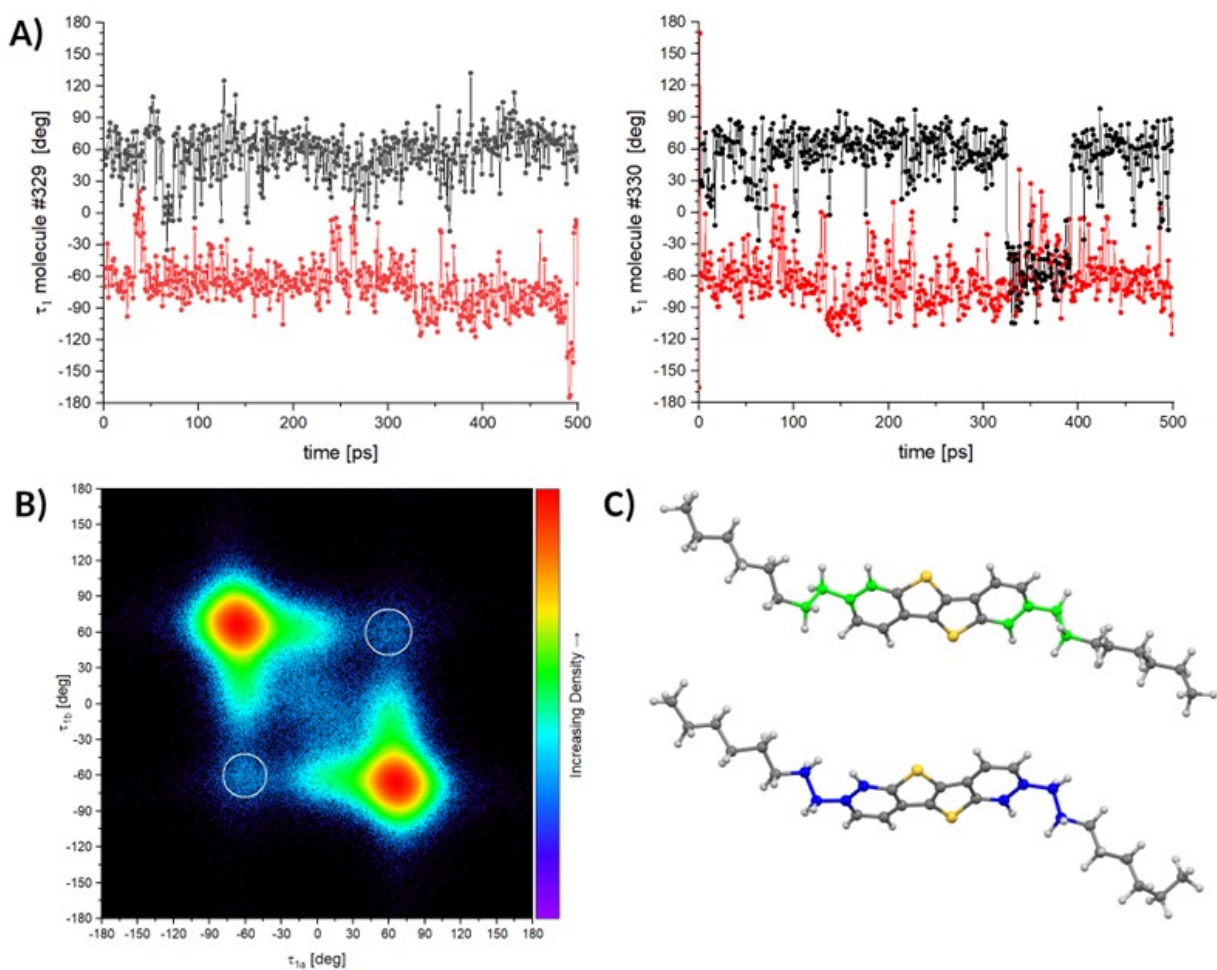

**Figure S1.** A) Trajectories of two randomly chosen molecules showing the dynamics of the alkyl chains. B) Density plot of torsion angle for chains A ( $\tau_{1A}$ ) and B ( $\tau_{1B}$ ). The white circles enclose the sparsely populated regions of torsions with the same sign. C) Two representative conformations with non-centrosymmetric chains (top, white circle region) and close to centrosymmetric (bottom, red region of the density plot).

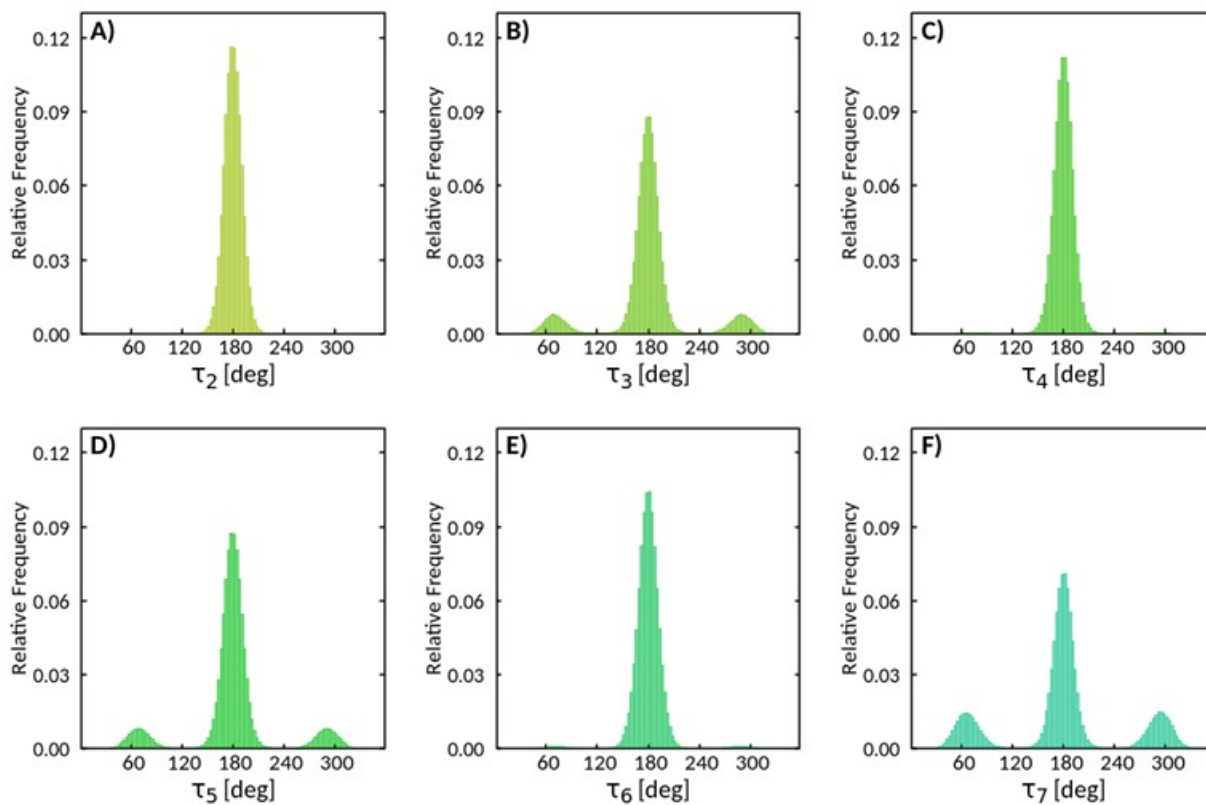

**Figure S2.** Probability distributions of angles  $\tau_2$ - $\tau_7$ , characterizing the conformational behavior of the octyl chains at 293 K.

**Table S1.** Percentages of torsional angle conformations at 293 K, obtained from 500 ps of NPT-BE simulation. The signs + and - refer to  $\tau$  around  $+67^\circ$ , or around  $-67^\circ$ , i.e.  $+293^\circ$ , respectively.

| Conformation              | $\tau_2$ | $\tau_3$ | $\tau_4$ | $\tau_5$ | $\tau_6$ | $\tau_7$ |
|---------------------------|----------|----------|----------|----------|----------|----------|
| <b>anti</b>               | 99.70    | 83.31    | 99.20    | 81.84    | 97.66    | 65.77    |
| <b>gauche<sup>+</sup></b> | 0.14     | 8.42     | 0.44     | 9.03     | 1.15     | 17.15    |
| <b>gauche<sup>-</sup></b> | 0.15     | 8.26     | 0.36     | 9.14     | 1.19     | 17.08    |
| <b>gauche (total)</b>     | 0.30     | 16.69    | 0.80     | 18.16    | 2.34     | 34.23    |

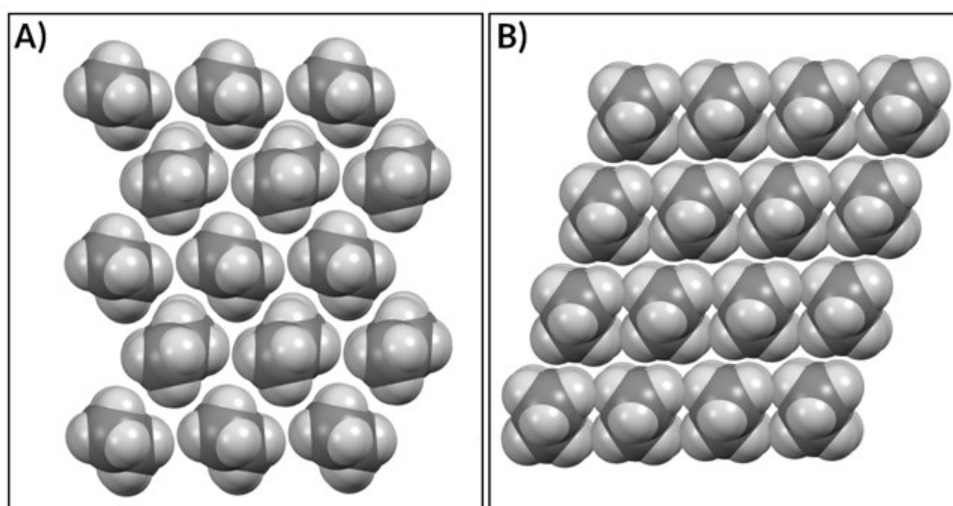

**Figure S3.** Views along the *c* axis of: A) C8-BTBT-C8 and B) octane monomolecular layers qualitatively comparing alkyl chain steric hindrance.

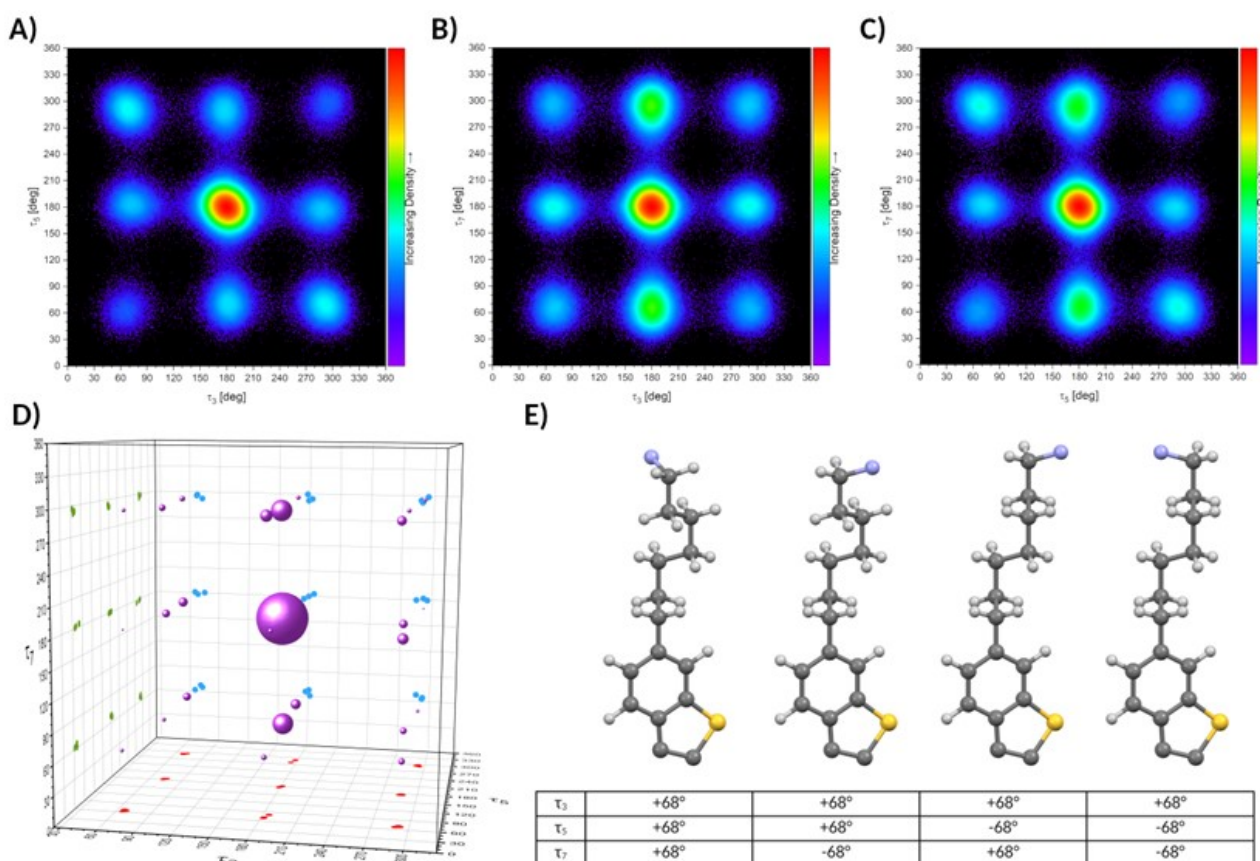

**Figure S4.** Distribution of torsion angles in subspace  $\tau_3$ - $\tau_5$ - $\tau_7$  showing the main conformational features of the octyl chains. A-C) Projections with density plots showing clustering of points; D) 3D plot showing data clustered in subspace  $\tau_3$ - $\tau_5$ - $\tau_7$ ; each sphere's size is proportional to the square root of the corresponding cluster size. E) Idealized *agagag* conformations observed in the 293 K MD run (four enantiomeric conformations of those shown here are also present). The methyl group carbon atom with hydrogen atoms omitted for clarity is highlighted in blue.

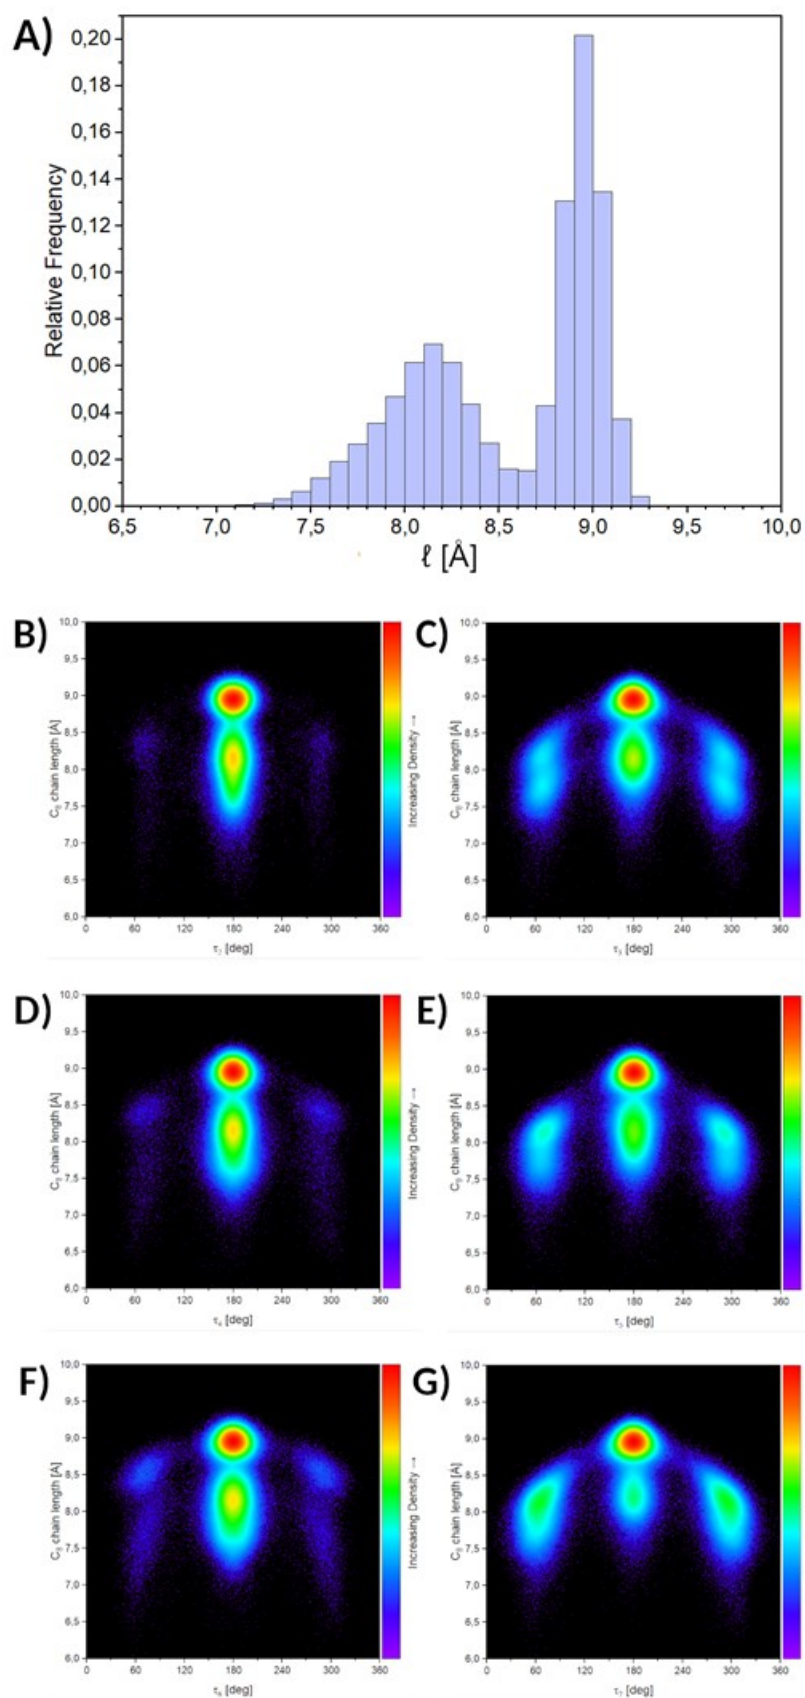

**Figure S5.** A) Probability distribution of alkyl chains length ( $\ell$ ). B-G) Density scatter plots of alkyl chain length versus torsion angles  $\tau_2$ - $\tau_7$ .

**Table S2.** Percentages of *a* (*anti*) and *g* (*gauche*) torsional angle combined conformations at 293 K.

| descriptor<br>$\tau_2\tau_3\tau_4\tau_5\tau_6\tau_7$ | % of cases |
|------------------------------------------------------|------------|
| <i>aaaaaa</i>                                        | 55.59      |
| <i>aaaaag</i>                                        | 18.44      |
| <i>aaagag</i>                                        | 6.24       |
| <i>agagag</i>                                        | 6.10       |
| <i>agagaa</i>                                        | 4.50       |
| <i>agaaaag</i>                                       | 2.82       |
| <i>agaaaa</i>                                        | 2.77       |
| <i>aaaaga</i>                                        | 1.19       |
| all                                                  | 97.65      |

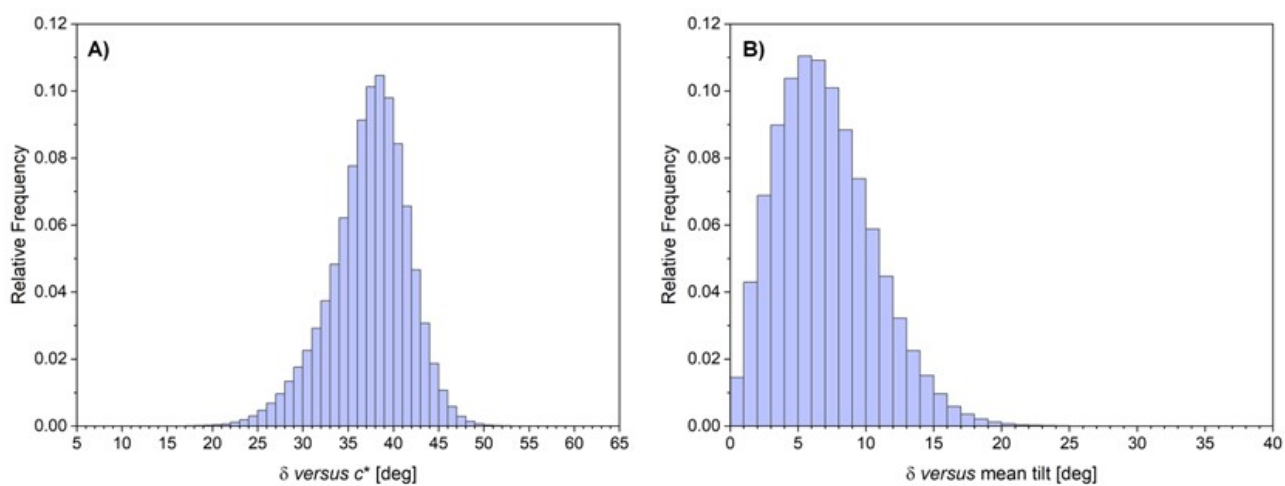

**Figure S6.** Distribution of chain tilt angle  $\delta$ : A) versus direction  $c^*$  and B) versus mean tilt direction for chains A and B merged due to centro-symmetry of the system.

**Table S3.** Average values of the tilt angle  $\delta$  from the 500-ps NPT-PR simulation at 293 K. Standard deviations are given in parentheses.

| reference  | $\delta$ [deg] |
|------------|----------------|
| $c^*$ axis | 37.3(4.3)      |
| mean tilt  | 7.02(3.6)      |

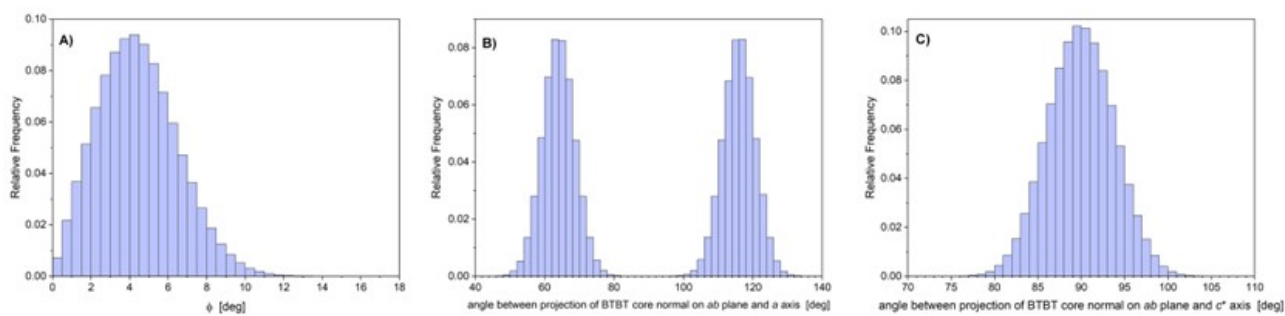

**Figure S7.** Distribution of A) the core tilt angle  $\phi$ . B) The angle between the projection onto the  $ab$  plane of the normal to the BTBT core and  $a$  axis. C) The angle of the BTBT core normal with respect to the reciprocal vector  $c^*$ .

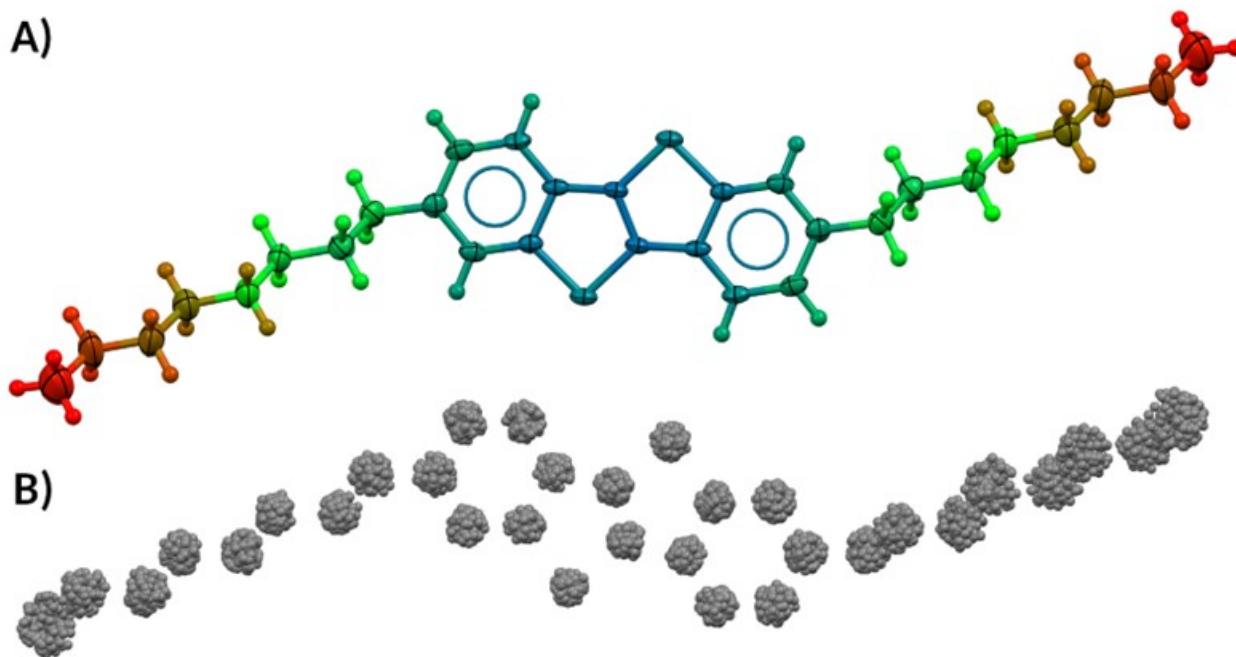

**Figure S8.** A) Molecular structure of C8-BTBT-C8 in the monoclinic polymorph [Izawa, T. et al. *Adv. Mater.* 2008, 20 (18), 3388–3392]. Non hydrogen atoms are represented with 30% level ellipsoids enhanced with fake colors (from blue to red for low to high ADP values). B) Non-hydrogen atomic positions for molecule #300 in the 293 K MD run; grey spheres correspond to the closest 30% of atomic positions with respect to their pertinent time averaged C and S atoms.



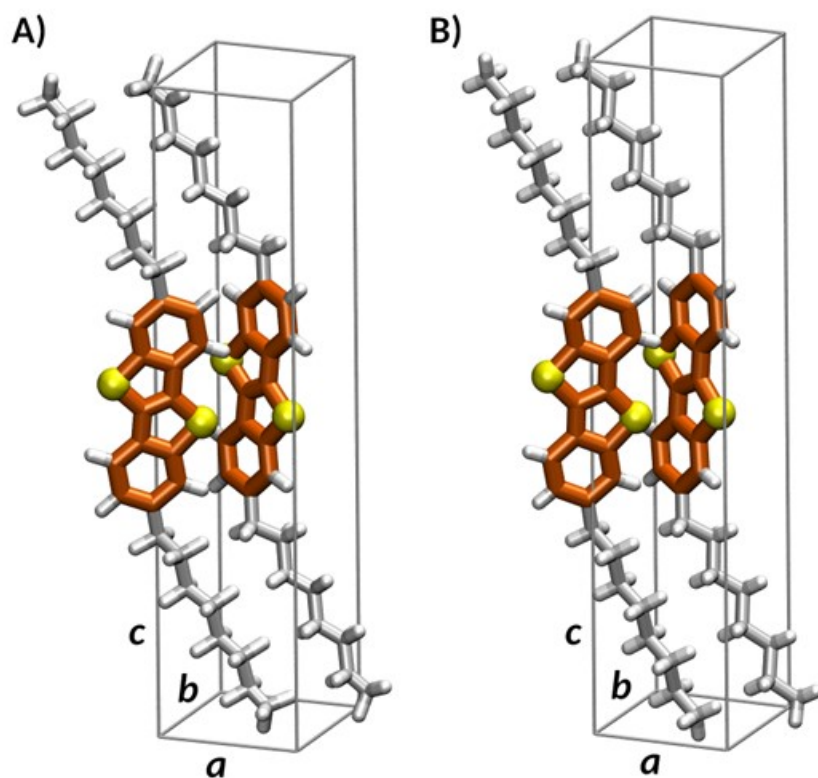

**Figure S9.** C8-BTBT-C8 unit cells: A) Average MD crystal structure obtained from the NPT-PR simulation at 293 K by averaging the atomic coordinates over 500 ps, whilst keeping two independent molecules. B) Experimental structure at 293 K [Izawa, T. et al. *Adv. Mater.* 2008, 20 (18), 3388–3392].

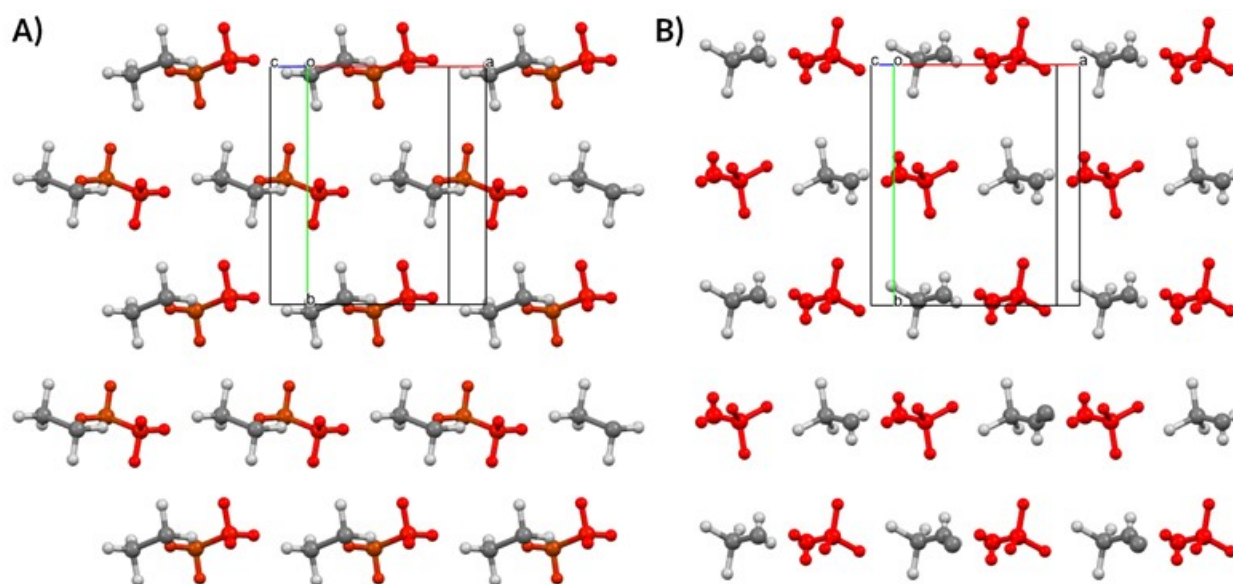

**Figure S10.** Comparison of two adjacent (001) monomolecular layers as seen along  $c^*$  enhancing the differences between A) the experimental [Izawa, T. et al. *Adv. Mater.* 2008, 20 (18), 3388–3392] and B) the average MD crystal structure.

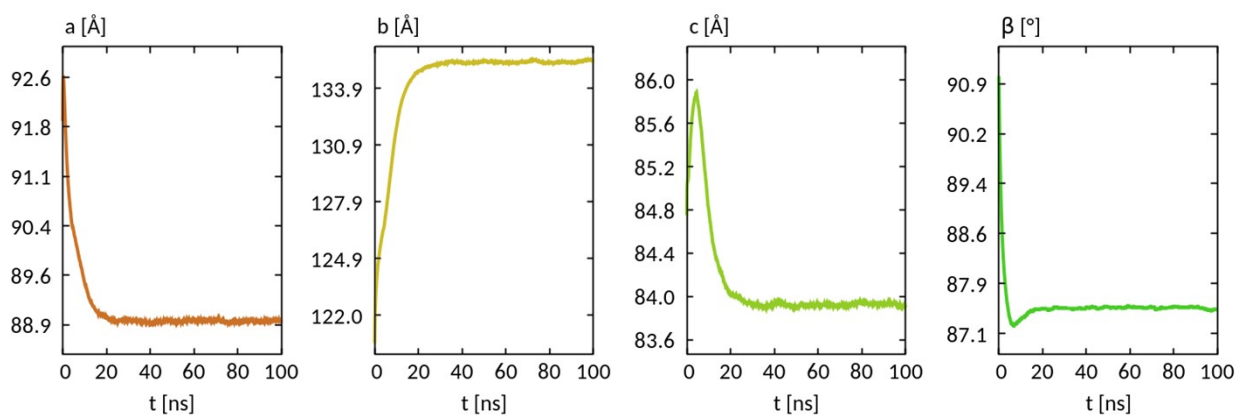

**Figure S11.** Evolution of simulation box parameters at 380 K.

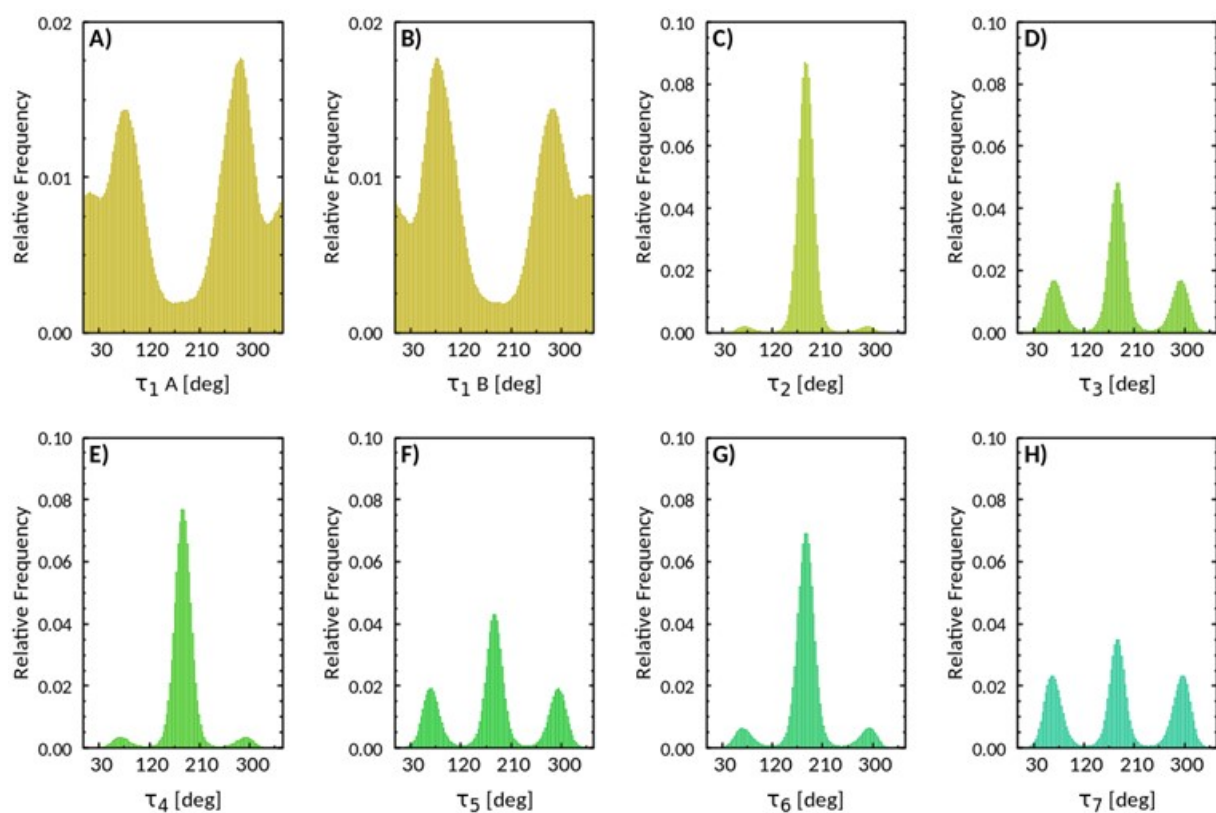

**Figure S12.** Cumulative dihedral angles distributions obtained from the NPT-BE run at 380 K.

**Table S4.** Percentages of *a* (anti) and *g* (gauche) torsional angle combined conformations at 380 K. Only those exceeding 1% of cases are reported.

| <b>descriptor</b><br>$\tau_2\tau_3\tau_4\tau_5\tau_6\tau_7$ | <b>% of cases</b> |
|-------------------------------------------------------------|-------------------|
| <i>aaaaag</i>                                               | 15.73             |
| <i>agagag</i>                                               | 14.14             |
| <i>aaagag</i>                                               | 12.37             |
| <i>aaaaaa</i>                                               | 10.96             |
| <i>agagaa</i>                                               | 8.20              |
| <i>agaaaag</i>                                              | 7.80              |
| <i>aaagaa</i>                                               | 5.45              |
| <i>agaaaa</i>                                               | 4.53              |
| <i>aaaaga</i>                                               | 2.64              |
| <i>aaaagg</i>                                               | 1.95              |
| <i>agagga</i>                                               | 1.46              |
| <i>aaaggg</i>                                               | 1.25              |
| <i>aaagga</i>                                               | 1.14              |
| <i>agaggg</i>                                               | 1.06              |
| <i>aagaga</i>                                               | 1.04              |
| all                                                         | 89.72             |

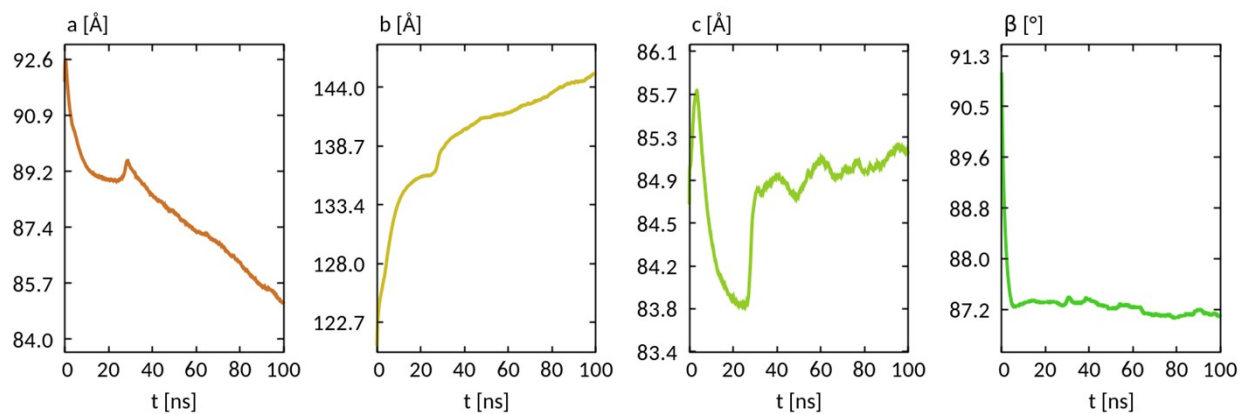

**Figure S13.** Evolution of simulation box parameters at 385 K.

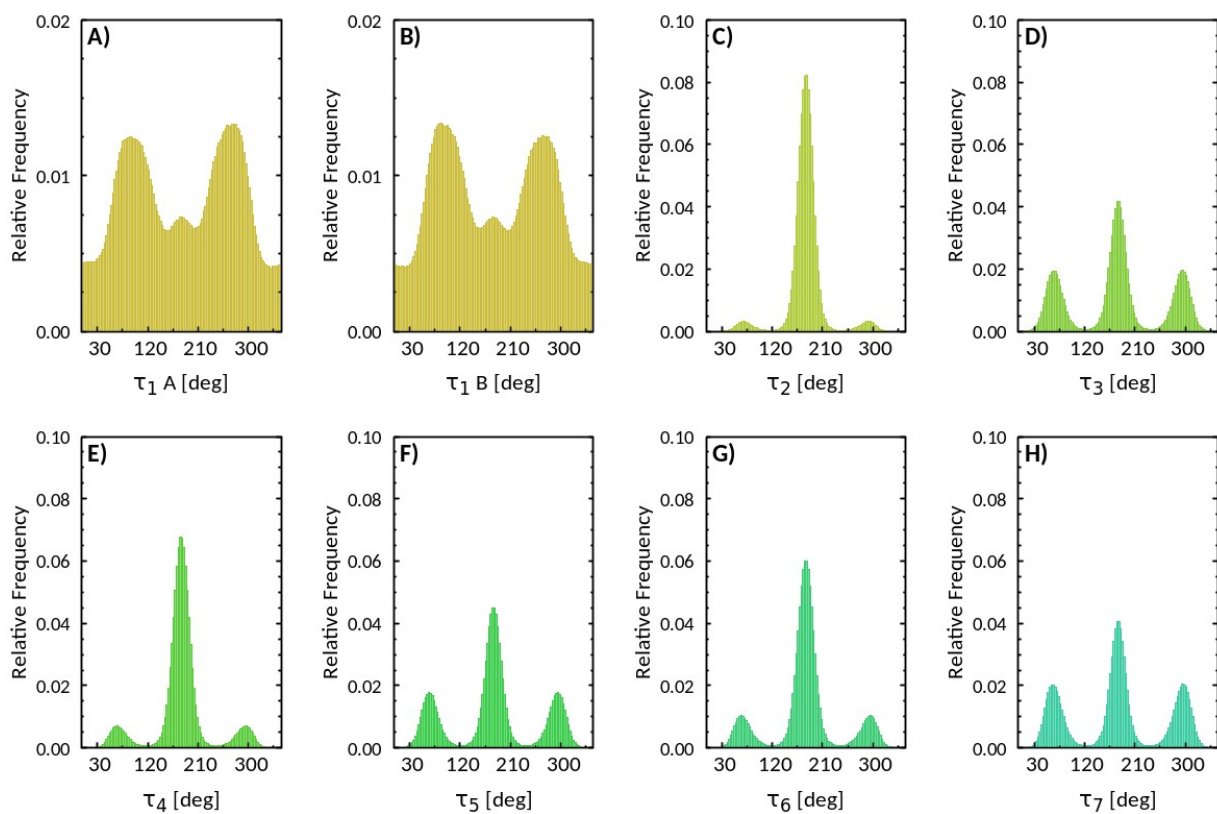

**Figure S14.** Cumulative dihedral angles distributions obtained from the NPT-BE run at 385 K.

**Table S5.** Percentages of *a* (anti) and *g* (gauche) torsional angle combined conformations at 385 K. Only those exceeding 2% of cases are reported.

| <b>descriptor</b><br>$\tau_2\tau_3\tau_4\tau_5\tau_6\tau_7$ | <b>% of cases</b> |
|-------------------------------------------------------------|-------------------|
| <i>agagag</i>                                               | 11.11             |
| <i>aaaaag</i>                                               | 8.24              |
| <i>aaaaaa</i>                                               | 7.51              |
| <i>aaagag</i>                                               | 7.24              |
| <i>agagaa</i>                                               | 7.16              |
| <i>agaaag</i>                                               | 7.10              |
| <i>agaaaa</i>                                               | 5.67              |
| <i>aaagaa</i>                                               | 4.27              |
| <i>aaaaga</i>                                               | 3.09              |
| <i>agaaga</i>                                               | 2.66              |
| <i>agagga</i>                                               | 2.29              |
| <i>aaaagg</i>                                               | 2.00              |
| all                                                         | 68.34             |

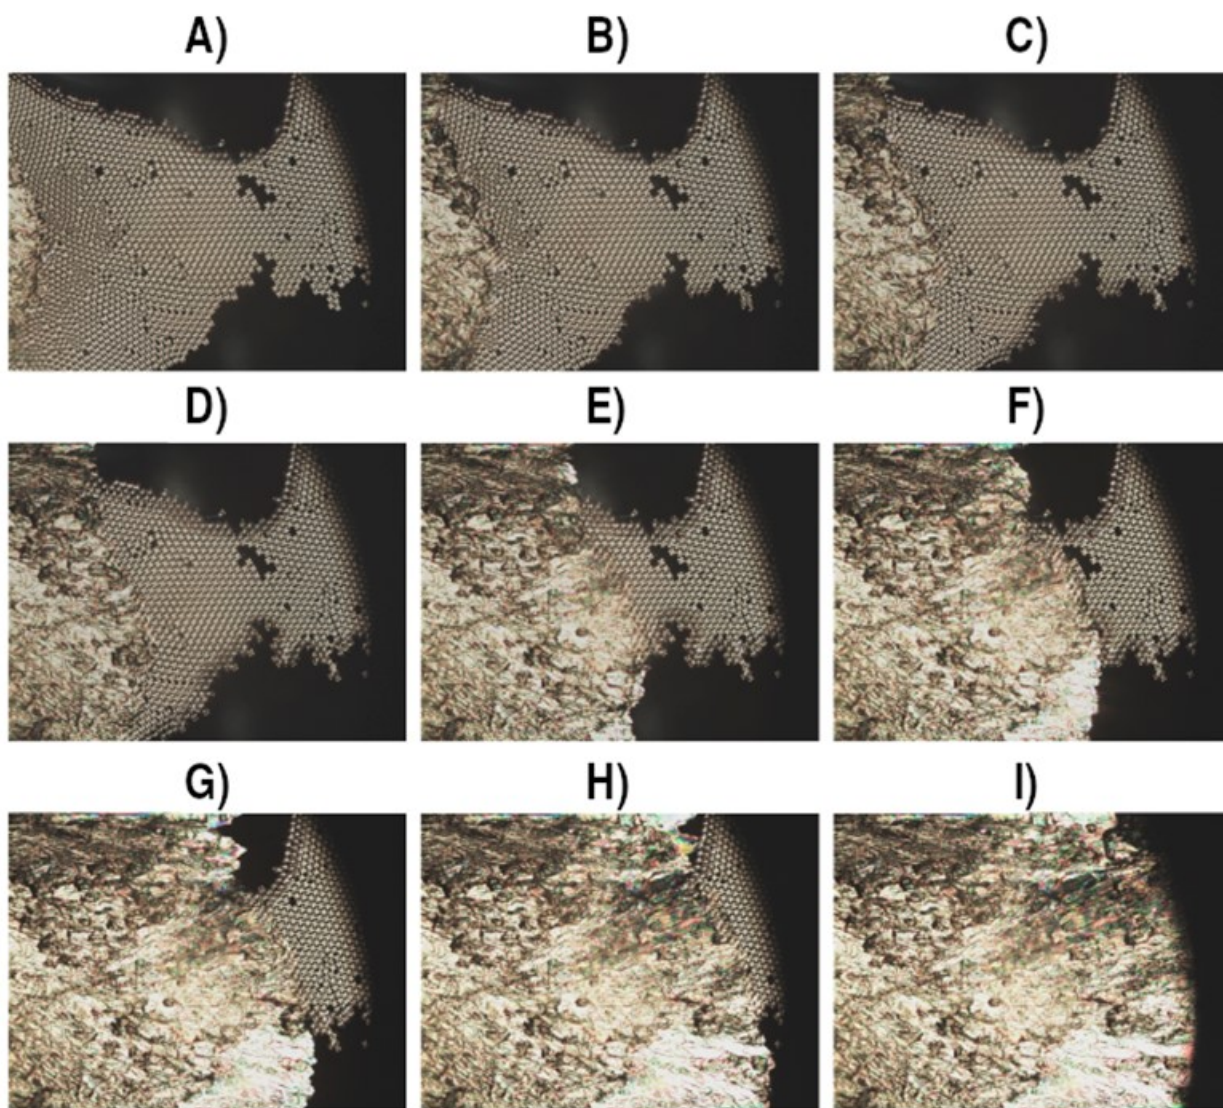

**Figure S15.** Focal conic domains (FCD) of the mesophase during cooling. The sequence was taken at 377 K (104 °C). The (micro)crystalline phase appears on the left of the imaged region. Images taken with Linkam THMS-600 heating stage (sample loaded in an open quartz cup) and metallographic microscope Olympus BX51 at 50x (images 1440  $\mu\text{m}$  along the horizontal axis) with crossed polarizer/analyzer.

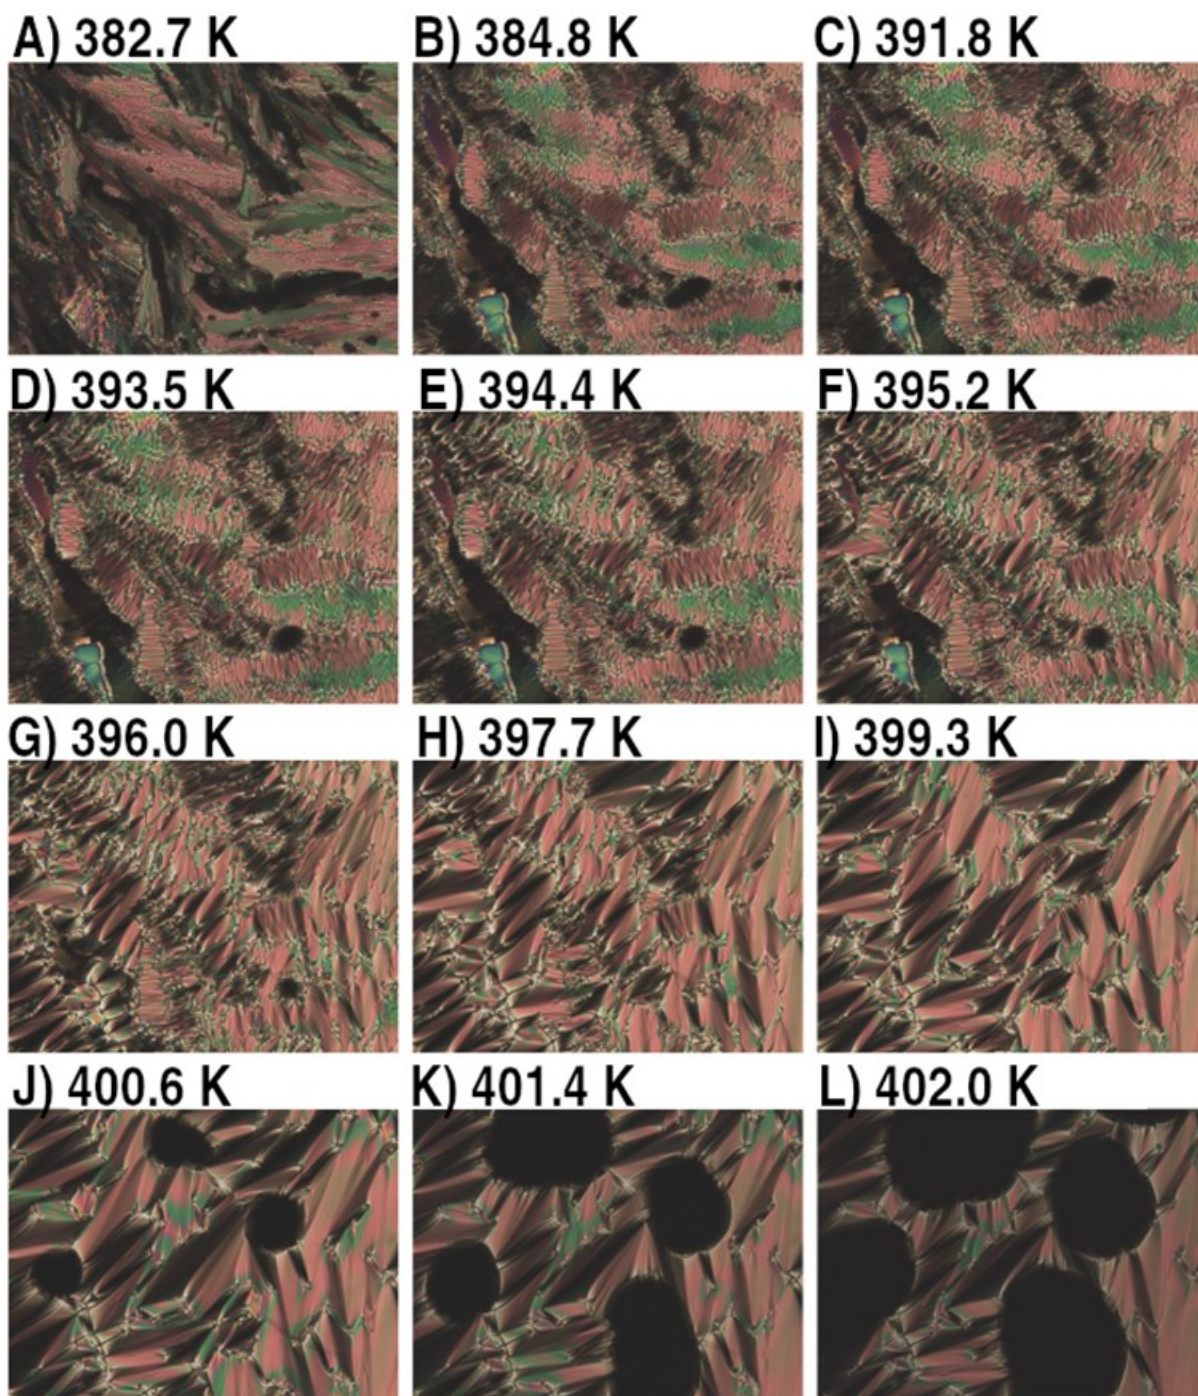

**Figure S16.** Smectic A large domains rearrange upon heating (heating rate +1 K/min) producing small striped domains (B-D) further coarsening into fan-shaped big islands (E-I) and eventually melting (J-L). The dark regions in images J-L correspond to expanding regions of isotropic melt. Images taken with Linkam THMS-600 heating stage (sample loaded in an open quartz cup) and metallographic microscope Olympus BX51 at 200x (images 360  $\mu\text{m}$  along the horizontal axis) with crossed polarizer/analyzer. Nominal temperatures reported suffered from thermal gradients in the central hole drilled out in the silver block of the heating stage.

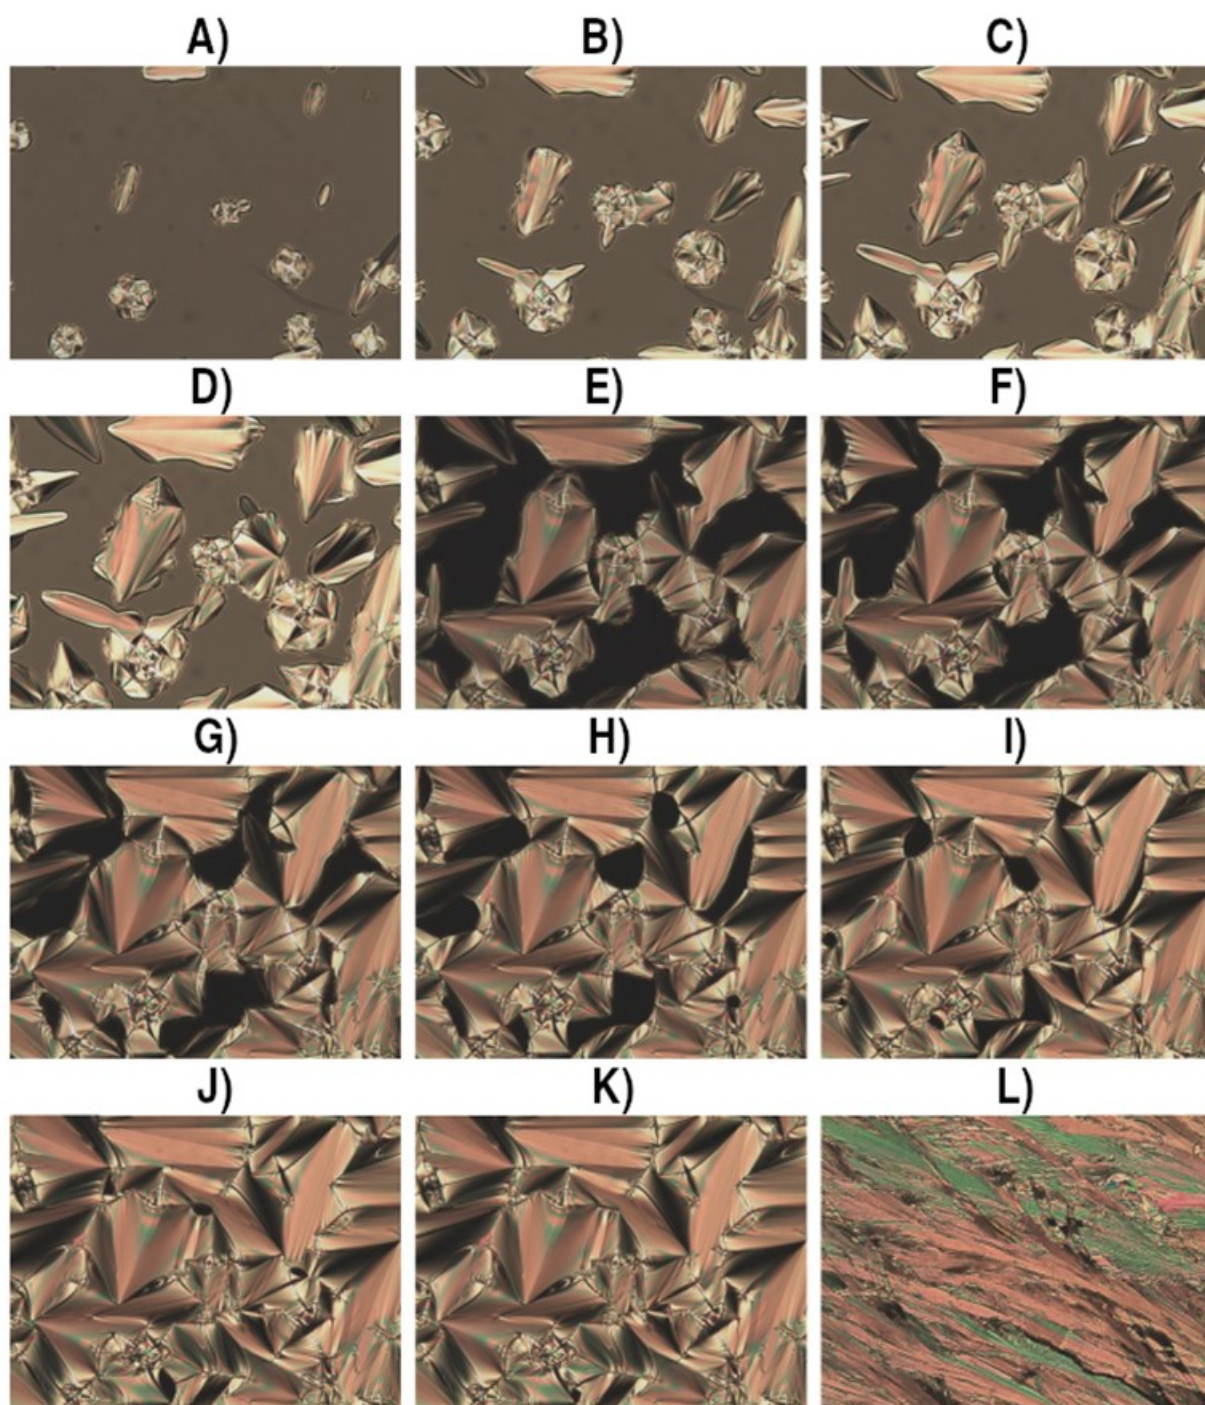

**Figure S17.** Starting from the isotropic liquid (before frame A) and cooling at  $-1$  K/min fan-shaped domains of the mesophase are formed (A-K) that eventually give rise to the crystalline state (L). Images taken with Linkam THMS-600 heating stage (sample between a quartz cup and 0.16 mm thick coverslip) and metallographic microscope Olympus BX51 at 50x (images  $1440 \mu\text{m}$  along the horizontal axis) with parallel (images A-D) and crossed (E-L) polarizer/analyzer.



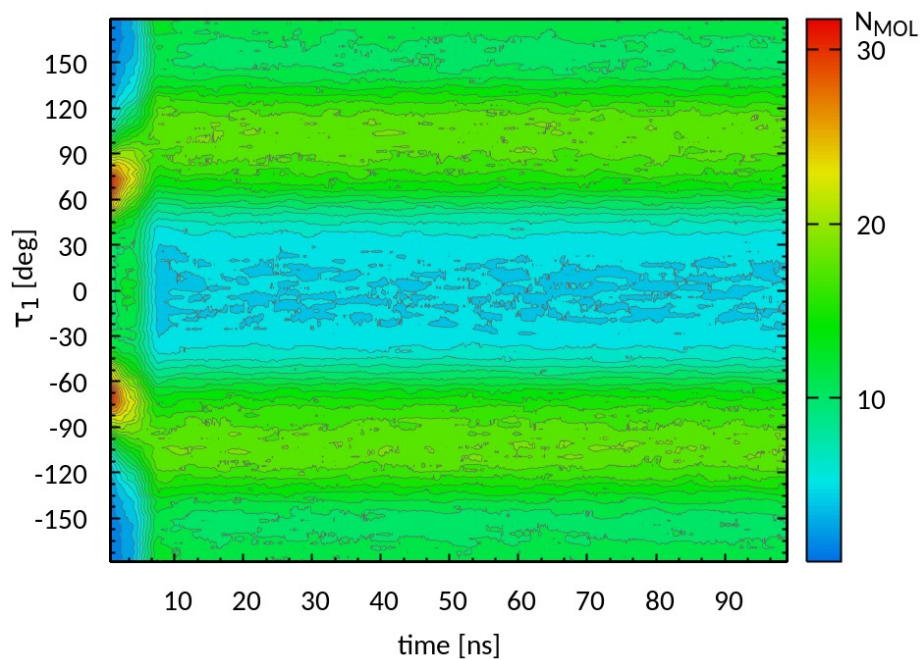

**Figure S18.** Evolution of the tilt angle  $\varphi$  obtained from the NPT-BE simulation at 400 K. The absolute molecular populations are also reported. For better clarity, the data have been window-averaged over time intervals of 3 ns.

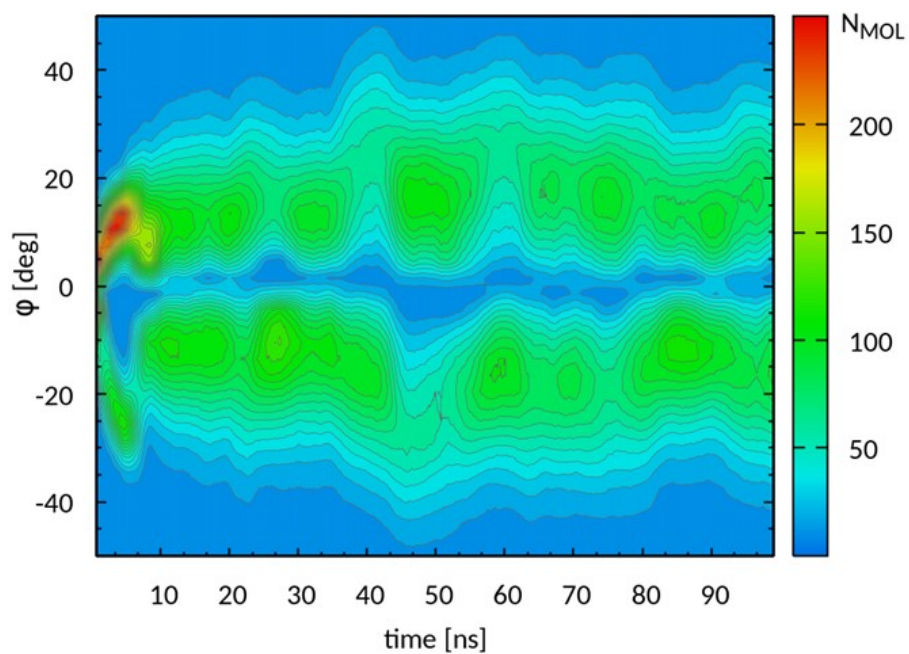

**Figure S19.** Evolution of the torsional angle  $\tau_1$  obtained from NPT-BE simulations at 400 K. The absolute molecular populations are also reported. For better clarity, the data have been window-averaged over time intervals of 3 ns.

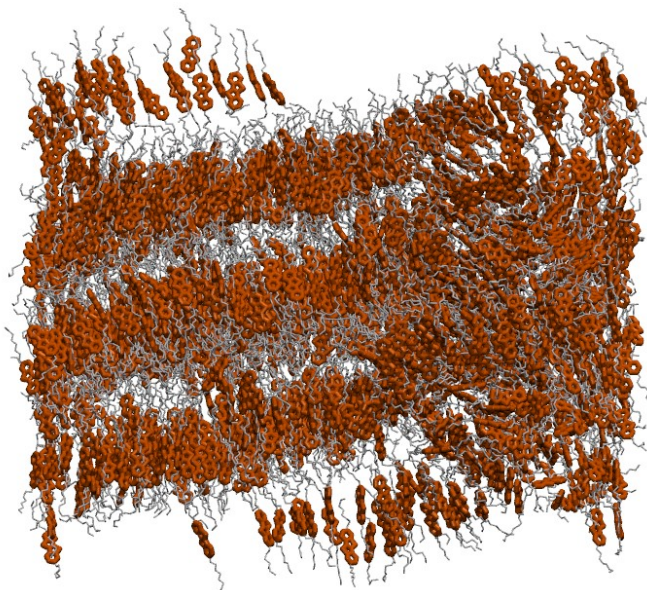

**Figure S20.** Final snapshot of the 100-ns BE simulation performed by cooling the isotropic molten phase from 460 to 385 K. A linear temperature gradient was adopted over a simulation time of 100 ns.

**Movie S1.** Dynamics of C8-BTBT-C8 supercell at 385 K, highlighting the change in core tilt angle,  $\varphi$ , and diffusion phenomena. The molecules have been colored according to their orientation (red for  $\varphi < 0^\circ$ , blue for  $\varphi > 0^\circ$ ). Alkyl side chains and hydrogens have been omitted for clarity.
